# Supplementary material for: Self-Assembly and Nanostructures in Organogels Based on a Bolaform Cholesteryl Imide Compound with Conjugated Aromatic Spacer
Source: MDPI journal article supplement (doi:10.3390/ma6125893), 2013-12-12

## Supplementary Information

**Figure S1.** AFM images of xerogels from CH-PY gels: (a–f) n-pentanol, cyclopentanone, cyclohexanone, n-butyl acrylate, THF, DMF, respectively. The scan bar is 10  $\mu\text{m}$ .

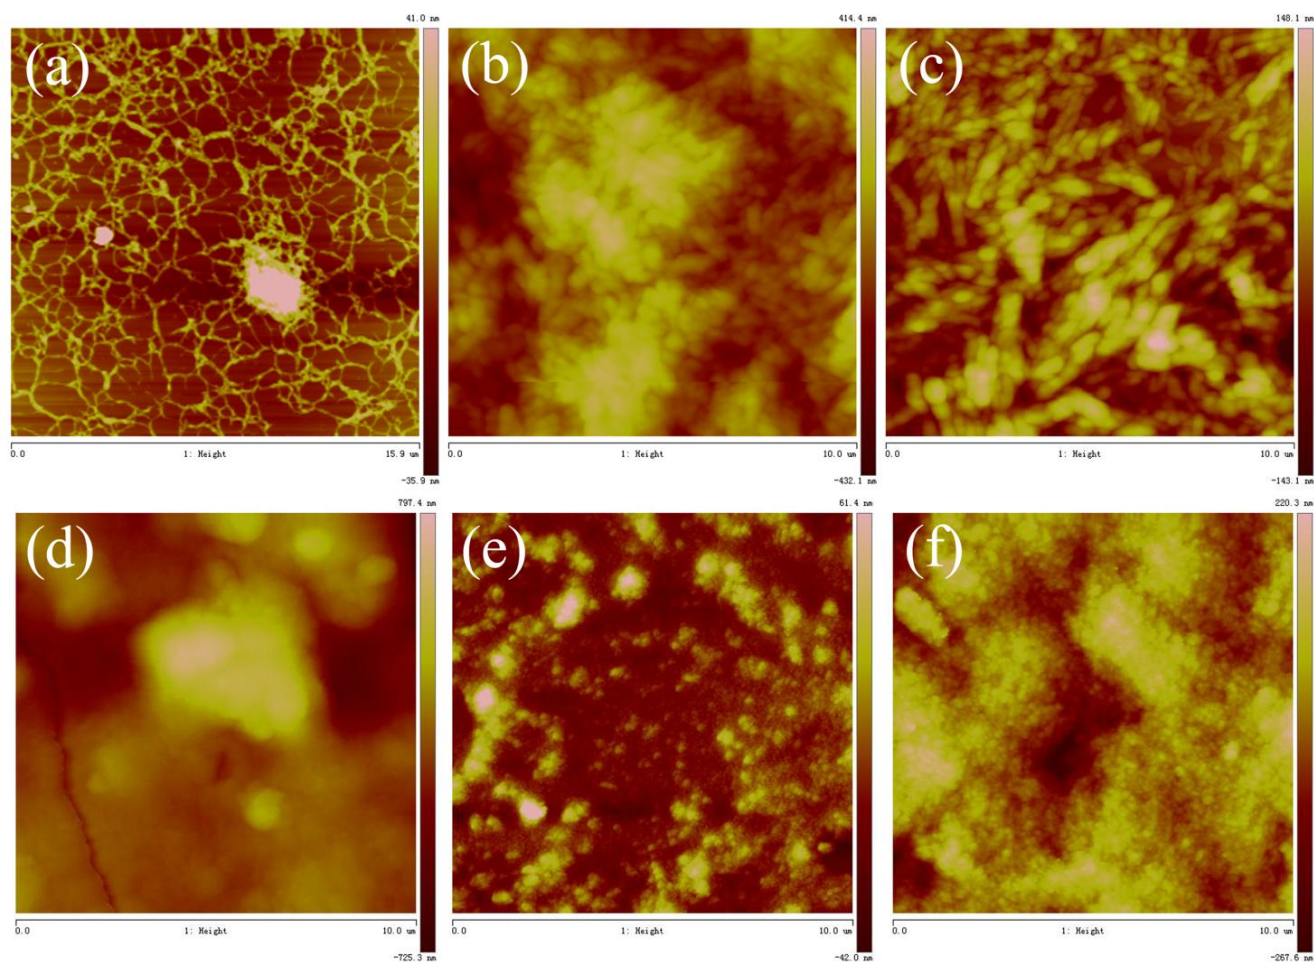

Supplement: s1 [file s1]
